# Supplementary material for: Identification and Functional Analysis of Interleukin-1β in the Chinese Soft-Shelled Turtle Pelodiscus sinensis
Source: PubMed Central journal article supplement (PMC4880838; doi:10.3390/genes7050018), 2016-05-04
Supplement: genes-07-00018-s001.pdf [file genes-07-00018-s001.pdf]

1 tgcagccgggcccgggcccggcctgagcgATGCGGATCGGCAGCTCGGCAGCGTGCCGACCAGGTTTCGTGG  
1 M A D R Q L G S V R T R F V

73 AGAGCGTGAGCAAAGCCGTGATCAACTCCCTCCTGGACGACCTGCTGGAGAAGCAGGTGCTGAACGAGGAGG  
15 E S V S K A V I N S L L D D L L E K Q V L N E E

145 AGGTGGAGGAGGTGAGGGAAGGCCACAGCAAGAAGAGTGACCAAGCCAGGTGTCTGATCGATGGGGTGAGGA  
39 E V E E V R E G H S K K S D Q A R C L I D G V R

217 AAAAGGGAGCCAGAGCCAGCGAGATCTTCATCCGGTGCCTCTGCTGCAGAGACGTGCACCTGGCCAGTGACC  
63 K K G A R A S E I F I R C L C C R D V H L A S D

289 TGGGGCTGGCAGCCCCCTCGGCTACCGCAGGGGTTCAGTGCCACAGCCAGGGCCGGCCCCCAGGAGAACG  
87 L G L A A P S A T A G V P V P Q P G P A P Q E N

361 AGCCAGGGTCCACCGCAGAAACCCAGCCAGCGCCATGCGAGGGCTGGATCCGGCCCTGCCCCCGGAGGACG  
111 E P G S T A E T Q P A P C E G W I R P C P P E D

433 TCCAGCGGATCCAGAGGGAGGAAGCAAAGGAGATCTATCCCATCCGGGACAAGGCAACACGAACCCGCTGG  
135 V Q R I Q R E E A K E I Y P I R D K A T R T R L

505 CCCTCATCATCTGTAACGTAGAGTTTCGAGCATCTCCCCAGGCGGGGCGGGGCGACGTGGACGTGAGTGGGA  
159 A L I I C N V E F E H L P R R G G A D V D V S G

577 TGCAGAGGCTTCTAGAGGGGCTGGGCTACAAGGTGAAACCTACTGCAACTTACCCGCCAGGACATGCTGG  
183 M Q R L L E G L G Y K V E T Y C N L P A Q D M L

649 CAACGCTGAAGCAGTTTGTCTGCTCGGGACGAGCACCAGACCTCGGACAGCACCTTCCTTGTGCTCATGTCCC  
207 A T L K Q F A A R D E H Q T S D S T F L V L M S

721 ATGGCGTCCGGGCGAGGCTGTGCGGGACGAAGAGCCACGGCGGGGCCACGGACATCCTTCCCGTCGACACCA  
231 H G V R A G L C G T K S H G G A T D I L P V D T

793 TCTACGACACCTTCAACAACAAGAGCTGCCAGGCCCTGCTGGGCAAGCCCAAAGTGATCATCATCCAGGCCCT  
255 I Y S T F N N K S C Q A L L G K P K V I I I Q A

865 GCCGGGGGAGAGCCAGGGACACGTGTGGGTGAGCGACTCCGAGAGCTCCCTGGAGATGGCGCCAGCCCTG  
279 C R G E S Q G H V W V S D S A E L P G D G A S P

937 CGCCATGGCCCACCGAAGAGCTGGAAGATGATGCCACCCACCAAATCCACGTGGAGAGCGATTTCATCTGCT  
303 A P W P T E E L E D D A T H Q I H V E S D F I C

1009 TCCACTCCACAACGCCAGACACCGTGTCTGAGAGAAGTCCGAAAACCTGGCTCCGCTTTCATCAAATGCCTGA  
327 F H S T T P D T V S W R S P K T G S V F I K C L

1081 TAGAGCAGCTCCAAACCAACGCCTGGCGCTTCCCCTTGGAGGAGATCTTCCGAAAGGTCCAGCTCTCCTTTC  
351 I E Q L Q T N A W R F P L E E I F R K V Q L S F

1153 AAAATTTTCCTCGTCAGATGCCACAAAAGAGAGAACTACCATGCTGAAAAAGTTTACCTGTTCCCGGGC  
375 Q N F P R Q M P T K E R T T M L K K F Y L F P G

1225 ATTAGgacaagcccacgatatggcagagcatttcccggggcccagcctcagtcagca  
399 H \*

**Figure S1.** Nucleotide and amino acid sequence of partial cDNA of *P. sinensis* caspase-1. The start and stop codons are boxed, CARD domain of caspase-1 is highlighted in grey and CASCs domain is highlighted in black. The caspase-1 pentapeptide active-site motif sequence QACRG is highlighted in red.

**Table S1.** PCR primers.

| Primers                    | Nucleotide sequence(5'–3')                                            | Application(s)                                              |
|----------------------------|-----------------------------------------------------------------------|-------------------------------------------------------------|
| tIL-1 $\beta$ -deg-F1      | CAATCTCTACATGTCTYTG                                                   | Amplifying intermediate fragments                           |
| tIL-1 $\beta$ -deg-F1      | GGGGAAACCGGCM5                                                        |                                                             |
| tIL-1-R1                   | CGAACTGGGTGGTGTCCCCGCTCT                                              | 5'Race                                                      |
| tIL-1-R2                   | GCATGGGCTGCTGGCCGTTGTG                                                |                                                             |
| GeneRacer 5'Primer         | C GACTGGAGCACGAGGACACTGA                                              |                                                             |
| GeneRacer 5' nested Primer | GGACACTGACATGGACTGAAGGAGTA                                            |                                                             |
| tIL-1-F1                   | CAGAGGCCCGAGCTGGAGCGTT                                                | 3'Race                                                      |
| tIL-1-F2                   | GAGCGGGGACACCACCCAGTTCGA                                              |                                                             |
| GeneRacer 3'Primer         | GCTGTCAACGATACGCTACGTAACG                                             |                                                             |
| GeneRacer 3' nested Primer | CGCTACGTAACGGCATGACAGTG                                               |                                                             |
| tcas-1-cF                  | CCTGAGCGATGGCGGATCGGCA                                                | Tcaspase-1 cloning                                          |
| tcas -1-cR                 | CGTGGGCTTGTCCTAATGGCCGG                                               |                                                             |
| tIL-1-cF                   | CACATATGGCAGCTGTCCCCGACAT                                             | t-IL-1beta precursor cloning                                |
| tIL-1-cR                   | TATCTCGAGGTGCTTGGCCTGCGTGAGCA                                         |                                                             |
| tIL-1-g1F                  | GGGCCAGCACTCGCATCACA                                                  | Gene organization                                           |
| tIL-1-g1R                  | CCGGGGGCTCAGTGCTTGGC                                                  |                                                             |
| tIL-1-g2F                  | ATCACAGGTTTCACCACCAGACGCAGCCAT                                        |                                                             |
| tIL-1-g2R                  | TGCGTGAGCAGGTAGTTGGTGATGAACACC                                        |                                                             |
| tIL-1-Flag-F               | CTCGGATCCCAGGTTTCACCACCAGACGCAGCC                                     | pcDNA3-tIL-1 $\beta$ -Flag                                  |
| tIL-1-Flag-R               | TATCTCGAGGTGCTTGGCCTGCGTGAGCAGGTAG                                    |                                                             |
| tCasp1-HA-F                | ATTAAGCTTGCCACCATGTACCCATACGATGTTCCAGATTACG<br>CTGCGGATCGGCAGCTCGGC   | pcDNA3-tcasp1-HA                                            |
| tCasp1-HA-R                | TAATCTCGAGCTAATGGCCGGGGAACAGG                                         |                                                             |
| rtIL-1-F                   | AATCATATGTACCGCTACCTCCGCTCCAT                                         | Cloning of tIL-1 $\beta$ (Y118-276H) C terminal into pET32a |
| rtIL-1-R                   | TATCTCGAGGTGCTTGGCCTGCGTGAGCA                                         |                                                             |
| tIL-1 $\beta$ -Bac-F       | ACATTTCTTACATCTATGCGATGGCAGCTGTCCCCGACATGC                            | Cloning of tIL-1 $\beta$ into pFastBacHT-melittin           |
| tIL-1 $\beta$ -Bac-R       | CTCTAGTACTTCTCGACAAGCTTTAATGGTGATGGTGATGGTGA<br>TGGTGCTTGGCCTGCGTGAGC |                                                             |
| tIL-1 $\beta$ -Bac-131-F   | ACATTTCTTACATCTATGCGATGACTGACCAGAAGTGCTTCAAG                          | Cloning of tIL-1 $\beta$ (131–277) into pFastBacHT-melittin |
| tIL-1 $\beta$ -Bac-131-R   | CTCTAGTACTTCTCGACAAGCTTTAATGGTGATGGTGATGGTGA<br>TGGTGCTTGGCCTGCGTGAGC |                                                             |
| tIL-1-qF                   | CTTCTCGACAATGACTT                                                     | IL-1 $\beta$ Q-RT-PCR                                       |
| tIL-1-qR                   | GTAGCGGTAGATGGAATT                                                    |                                                             |
| COX-2-qF                   | TTGACCGATATGAATGTG                                                    | COX-2 Q-RT-PCR                                              |
| COX-2-qR                   | AATGAGTGAGGATGTAGT                                                    |                                                             |
| IL-18-qF                   | GGTAGACAACAAGACTTAC                                                   | IL-18 Q-RT-PCR                                              |
| IL-18-qR                   | CTCGCATTAGTGAAGATT                                                    |                                                             |
| tCasp-1-qF                 | ATCTTCCGAAAGGTCCAG                                                    | tCASP-1 Q-RT-PCR                                            |
| tCasp-1-qR                 | TTCAGCATGGTAGTTCTCT                                                   |                                                             |
| $\beta$ -actin-qF          | GAGACCCGACAGACTACCT                                                   | $\beta$ -actin Q-RT-PCR                                     |
| $\beta$ -actin-qR          | AGGATGATGAAGCAGCAGT                                                   |                                                             |
